# Supplementary material for: Identification and validation of four hub genes involved in the plaque deterioration of atherosclerosis
Source: publisher site journal article supplement (doi:10.18632/aging.102200), 2019-08-26
Supplement: Supplementary file [file aging-v11i16-102200-supplementary-material-SD1.pdf]

## SUPPLEMENTARY TABLES

Please browse Full Text version to see the data of Supplementary Tables 1–3.

**Supplementary Table 1. GO result of differentiating plaque sets.**

**Supplementary Table 2. KEGG PATHWAY result of upregulated genes in differentiating plaque sets.**

**Supplementary Table 3. KEGG PATHWAY result of poor prognosis sets.**

**Supplementary Table 4. Sample characteristics in this study.**

| Parameters                                  | Symptomatic patients | Asymptomatic patients |
|---------------------------------------------|----------------------|-----------------------|
| Age (years)                                 | 66.8 (SD 7.2)        | 65.1 (SD 5.2)         |
| Diabetes (%)                                | 80%                  | 70%                   |
| Hypertension (%)                            | 50%                  | 50%                   |
| Smoking (past or current, %)                | 60%                  | 60%                   |
| Dyslipidemia (%)                            | 80%                  | 80%                   |
| Statin treatment (%)                        | 90%                  | 80%                   |
| Fasting lipoproteins (mmol/L):              |                      |                       |
| Total cholesterol                           | 4.04 (SD 1.06)       | 3.77 (SD 0.76)        |
| LDL cholesterol                             | 2.39 (SD 0.77)       | 2.24 (SD 0.32)        |
| HDL cholesterol                             | 0.95 (SD 0.17)       | 1.01 (SD 0.24)        |
| Triglycerides                               | 1.18 (SD 0.32)       | 1.33 (SD 0.27)        |
| Creatinin (mmol/L)                          | 77.7 (SD 18.99)      | 68.3 (SD 12.49)       |
| High sensitive-CRP (mg/L)                   | 4.23 (SD 5.45)       | 2.84 (SD 1.67)        |
| White blood cell count (10 <sup>9</sup> /L) | 6.14 (SD 1.55)       | 5.89 (SD 1.37)        |

Please browse Full Text version to see the data of Supplementary Table 5.

**Supplementary Table 5. The results of differentiating plaque sets and poor prognosis sets using RRA.**
