# Supplementary material for: Identification and validation of four hub genes involved in the plaque deterioration of atherosclerosis
Source: Aging (Albany NY). 2019 Aug 26;11(16):6469–89. doi: 10.18632/aging.102200 (PMC6738408; doi:10.18632/aging.102200)
Supplement: Supplementary Table 5 [file aging-11-102200-s003.xlsx]

## Sheet: 1.Differentiating plaque sets
Table 2-1. The RRA result of differentiating plaque sets
Gene	Pvalue	logFC	Label
ACP5	0.00123726	1.2254	up
ADAM8	0.00168708	1.07853	up
ADRA2C	0.000674916	-1.32842	down
APOD	0.00101233	-1.18539	down
ATP8B2	0.000562438	-1.33426	down
C15orf48	0.0020244	1.0797	up
CCL18	0.00213684	1.02961	up
CCL3	0.000899862	1.35827	up
CCL3L3	0.00146217	1.19643	up
CCL4	0.0011248	1.23872	up
CD52	7.11e-05	1.17955	up
CD84	0.00126149	1.01184	up
CHI3L1	0.000674916	1.44499	up
CXCL14	0.000112494	-2.37993	down
CYBA	0.000190475	1.00688	up
DES	0.0011248	-1.13437	down
DGKK	0.000112494	-1.28685	down
FBLN1	0.00191197	-1.0391	down
FGF1	0.0011248	-1.03885	down
HAND2	0.00123726	-1.18151	down
HLA-DQB2	4.68e-05	1.74081	up
HMOX1	0.00258656	1.03355	up
HP	0.000899862	-1.22395	down
IBSP	0.000562438	1.64563	up
IGLL5	0.00157463	1.17724	up
IL1RN	0.00191197	1.17308	up
IL4I1	0.000207299	1.52149	up
LELP1	0.000449956	-1.11584	down
MFSD4A	0.000112494	1.07681	up
MMP1	0.00078739	1.3732	up
MMP12	0.000449956	1.68116	up
MMP7	0.000224985	1.99007	up
MMP9	0.000112494	2.10033	up
MYOC	0.000562438	-1.33355	down
NBLA00301	0.00157463	-1.04468	down
PDE8B	1.24e-06	-2.04689	down
PI16	0.000337472	-1.97707	down
PLA2G2A	0.000224985	-2.05519	down
PLAC9	0.00134972	-1.15538	down
PLIN4	0.00078739	-1.2644	down
RAB42	0.00236171	1.03164	up
SCARA5	0.00179952	-1.0019	down
SCRG1	0.00168708	-1.04068	down
SFRP1	0.00134972	-1.15404	down
SPON1	0.000449956	-1.4206	down
SPP1	0.000337472	1.81686	up
TIFAB	0.00382302	1.01405	up
TM4SF19	0.00179952	1.07146	up
TMEM220	0.000674916	-1.03091	down
TRAF1	0.000224985	-1.0415	down
UBA2	0.00146217	-1.14003	down

## Sheet: 2.Poor prognosis sets
Supplementary Table 5. The RRA result of poor prognosis sets
Name	Pvalue	logFC	Label
MBNL1-AS1	0.000919223	-1.15396	down
PNMAL1	0.00220578	-1.39172	down
ANO1	0.00244084	-1.49509	down
AOC3	0.00269777	-1.339	down
SYNC	0.00367563	-1.16805	down
ACTA2	0.00397608	-1.7167	down
ST6GAL2	0.00422668	-1.22421	down
PCDHB16	0.00477765	-2.36721	down
LINC00702	0.0049613	-1.10968	down
NEXN	0.00514493	-1.33586	down
CNTN3	0.00569578	-1.00262	down
ASPN	0.0057059	-1.1269	down
RBM20	0.00624655	-1.03109	down
FIBIN	0.0100998	-1.59391	down
AK5	0.0111177	-1.77771	down
GSTT2	0.0115668	-1.35739	down
NPNT	0.0117501	-1.54856	down
NAP1L3	0.0123	-1.0747	down
PLN	0.0124833	-1.51062	down
CSPG4	0.0132164	-3.06603	down
SUSD5	0.0135829	-1.65985	down
C12orf75	0.0139515	-1.01902	down
SYNM	0.014499	-1.0187	down
MRAP2	0.0150486	-1.16899	down
RERG	0.0154149	-1.01323	down
PPP1R14A	0.0155981	-1.59386	down
C1QTNF2	0.01645	-1.07901	down
FILIP1	0.0165137	-1.01113	down
LOXL1-AS1	0.0166968	-1.05839	down
MFAP4	0.0177952	-1.36483	down
LDOC1	0.020357	-1.213	down
TSPAN2	0.0214544	-1.28919	down
SLC22A3	0.0218202	-1.10807	down
CARMN	0.0235761	-1.23784	down
CRNDE	0.0238311	-1.18264	down
EFHD1	0.026389	-1.59921	down
ACKR4	0.02785	-1.22018	down
ITGA10	0.0285802	-1.35805	down
CRISPLD1	0.0325942	-4.53267	down
COL21A1	0.0345997	-1.83591	down
NOV	0.0364219	-1.18377	down
OGN	0.0393358	-3.20939	down
TMEM47	0.0398819	-1.20835	down
CPE	0.043157	-1.25203	down
PFN2	0.0435207	-1.04752	down
LOC101929787	0.0446117	-1.01373	down
COL14A1	0.0447935	-1.39497	down
ADAM12	0.0453388	-1.12558	down
ITGA1	0.0458841	-1.34229	down
CHN1	0.046663	-1.27165	down
MIR8071-2	0.000183862	3.40096	up
JCHAIN	0.000367715	2.87289	up
CCL18	0.000551559	2.47746	up
MMP12	0.000735395	1.58772	up
SPP1	0.000919223	1.12472	up
FCGR1B	0.00110304	1.30546	up
IGHA2	0.00147066	1.38309	up
ACP5	0.00165445	1.32948	up
FCGR2B	0.00183824	1.36557	up
TNFSF13B	0.00202201	1.13263	up
MMP9	0.00220578	1.09602	up
C1QB	0.00238954	1.49611	up
IGKV1OR2-108	0.00257329	3.41468	up
IGLL3P	0.00275704	2.71433	up
IFI30	0.00294077	1.14544	up
CXCR4	0.00330821	1.23949	up
VAMP8	0.00349192	1.0321	up
FCGBP	0.00367563	3.55481	up
IGK	0.00385932	2.42824	up
C1QC	0.004043	1.73634	up
CD52	0.00441034	3.12392	up
TYROBP	0.004594	1.31076	up
CTSS	0.00477765	1.09291	up
CD14	0.0049613	1.54075	up
VSIG4	0.00506687	1.2425	up
CCL3L3	0.00551217	1.02263	up
VMO1	0.00561785	3.01167	up
FCER1G	0.00569578	1.68055	up
FCGR1CP	0.00606297	1.02207	up
LAPTM5	0.00624655	1.1194	up
C3AR1	0.00643013	1.09649	up
APOE	0.00661369	1.10525	up
MS4A4A	0.00679725	1.29989	up
LY86	0.00716434	1.18732	up
AQP9	0.00753139	1.35853	up
UCP2	0.00837755	1.1653	up
HLA-DMA	0.00844888	1.60772	up
LY96	0.00863236	1.69102	up
HLA-DMB	0.00899928	1.05036	up
C1QA	0.00918272	1.42806	up
PLTP	0.00954959	1.38231	up
CAPG	0.00991643	1.15416	up
ITGB2	0.0102832	3.30199	up
HCK	0.0112001	1.51787	up
GPR34	0.0115668	1.49321	up
F13A1	0.0119334	1.25995	up
MS4A7	0.0121167	1.11275	up
CXCL16	0.0123	1.21561	up
ZNF331	0.0126475	1.68431	up
IGKV1OR2-118	0.0128499	1.62201	up
TSPAN13	0.0128825	1.23193	up
MPEG1	0.0141326	1.23363	up
C5AR1	0.0143158	1.12345	up
TMEM176A	0.0148654	1.22033	up
RARRES1	0.0150486	1.59072	up
LCP1	0.0152317	1.33799	up
TREM2	0.0157245	2.85912	up
ADAP2	0.0166968	1.01891	up
TPSB2	0.0168189	2.38649	up
TPSAB1	0.0168358	1.5894	up
HTR2B	0.0168799	1.41686	up
FPR3	0.017063	1.31368	up
IGLC1	0.0177952	1.7848	up
PLA2G7	0.0188933	1.43785	up
TNFRSF17	0.0194069	4.1571	up
MMRN1	0.0199912	1.87303	up
GPR183	0.02054	1.09512	up
FCGR3B	0.0207229	1.43955	up
IGLJ3	0.0212716	4.37164	up
CCL4	0.0214544	1.07926	up
PIK3AP1	0.022003	1.08085	up
CCL2	0.0221859	1.09777	up
TMEM255A	0.0221994	1.09235	up
CORO1A	0.0223687	1.36715	up
RAC2	0.0225516	1.07525	up
PYCARD	0.0229172	1.28854	up
SLC16A6	0.0234656	1.18302	up
IGHV3-23	0.025293	1.32612	up
HLA-DQA1	0.0260237	45.8273	up
HMOX1	0.02785	2.14313	up
S100A9	0.0283977	1.7353	up
ADORA3	0.0285802	1.16457	up
IGKC	0.0289453	2.31208	up
IL10RA	0.0293103	1.20169	up
LAIR1	0.0302228	1.01108	up
ACKR1	0.0304053	1.46459	up
IGLV1-44	0.0311351	5.64271	up
TCN2	0.0330595	1.34032	up
CD72	0.0340528	2.1061	up
MLIP	0.0347819	1.20488	up
SLCO2B1	0.0367863	1.16631	up
CD180	0.0369685	1.51492	up
CCRL2	0.0426113	1.14661	up
NCF4	0.0444299	1.6857	up
CD74	0.0495173	1.27655	up
ARRB2	0.0496988	1.3285	up
